# Supplementary material for: Comprehensive study of the Galactic Planetary Nebula NGC 2792
Source: Springer Nature journal article supplement (doi:10.1007/s10509-023-04218-x), 2023-07-01
Supplement: 10509_2023_4218_MOESM1_ESM.pdf [file 10509_2023_4218_MOESM1_ESM.pdf]

Table 2: Integrated  $F(\lambda)$  and de-reddened  $F_d(\lambda)$  line fluxes (relative to  $H\beta = 100$ ) for the PN **NGC 2792**, its hosting knots (**K1**, **K2**, **K3**, **K4**), and a control spectrum.

| $\lambda(\text{\AA})$ | Ion     | Entire nebula    |                         | K1              |                        | K2              |                        | K3              |                        | K4              |                        | Control spectrum |                        |
|-----------------------|---------|------------------|-------------------------|-----------------|------------------------|-----------------|------------------------|-----------------|------------------------|-----------------|------------------------|------------------|------------------------|
|                       |         | $F(\lambda)$     | $F_d(\lambda)$          | $F(\lambda)$    | $F_d(\lambda)$         | $F(\lambda)$    | $F_d(\lambda)$         | $F(\lambda)$    | $F_d(\lambda)$         | $F(\lambda)$    | $F_d(\lambda)$         | $F(\lambda)$     | $F_d(\lambda)$         |
| 3312.32               | O III   | $6.63 \pm 1.27$  | $10.40^{+2.60}_{-2.70}$ |                 |                        |                 |                        |                 |                        |                 |                        |                  |                        |
| 3340.76               | O III   | $5.53 \pm 0.83$  | $12.50^{+1.70}_{-1.70}$ |                 |                        |                 |                        |                 |                        |                 |                        |                  |                        |
| 3345.40               | Ne V    | $8.53 \pm 0.63$  | $16.00^{+1.30}_{-1.40}$ |                 |                        |                 |                        |                 |                        |                 |                        |                  |                        |
| 3425.50               | [Ne V]  | $20.99 \pm 0.51$ | $41.40^{+1.20}_{-1.20}$ |                 |                        |                 |                        |                 |                        |                 |                        |                  |                        |
| 3444.07               | O III   | $14.18 \pm 0.48$ | $26.50^{+1.00}_{-1.00}$ |                 |                        |                 |                        |                 |                        |                 |                        |                  |                        |
| 3669.46               | H I     | $0.22 \pm 0.06$  | $0.42^{+0.10}_{-0.10}$  |                 |                        |                 |                        |                 |                        |                 |                        |                  |                        |
| 3673.74               | H I     | $0.19 \pm 0.09$  | $0.47^{+0.15}_{-0.15}$  |                 |                        |                 |                        |                 |                        |                 |                        |                  |                        |
| 3676.36               | H I     | $0.32 \pm 0.06$  | $0.57^{+0.11}_{-0.11}$  |                 |                        |                 |                        |                 |                        |                 |                        |                  |                        |
| 3679.36               | H I     | $0.16 \pm 0.07$  | $0.37^{+0.12}_{-0.12}$  |                 |                        |                 |                        |                 |                        |                 |                        |                  |                        |
| 3682.81               | H I     | $0.24 \pm 0.05$  | $0.53^{+0.09}_{-0.09}$  |                 |                        |                 |                        |                 |                        |                 |                        |                  |                        |
| 3686.83               | H I     | $0.38 \pm 0.04$  | $0.68^{+0.06}_{-0.07}$  |                 |                        |                 |                        |                 |                        |                 |                        |                  |                        |
| 3691.56               | H I     | $0.55 \pm 0.11$  | $0.76^{+0.18}_{-0.18}$  |                 |                        |                 |                        |                 |                        |                 |                        |                  |                        |
| 3697.15               | H I     | $0.47 \pm 0.08$  | $0.90^{+0.13}_{-0.14}$  |                 |                        |                 |                        |                 |                        |                 |                        |                  |                        |
| 3703.86               | H I     | $0.77 \pm 0.06$  | $1.33^{+0.10}_{-0.11}$  |                 |                        |                 |                        |                 |                        |                 |                        |                  |                        |
| 3705.02               | He I    | $0.21 \pm 0.06$  | $0.37^{+0.10}_{-0.10}$  |                 |                        |                 |                        |                 |                        |                 |                        |                  |                        |
| 3711.97               | H I     | $0.84 \pm 0.09$  | $1.33^{+0.14}_{-0.16}$  | $1.07 \pm 0.17$ | $1.66^{+0.26}_{-0.25}$ | $0.81 \pm 0.12$ | $1.27^{+0.19}_{-0.19}$ | $1.54 \pm 0.11$ | $2.70^{+0.19}_{-0.20}$ | $0.79 \pm 0.11$ | $1.31^{+0.18}_{-0.18}$ | $0.84 \pm 0.05$  | $1.39^{+0.09}_{-0.09}$ |
| 3721.63               | [S III] | $0.53 \pm 0.09$  | $1.13^{+0.14}_{-0.16}$  | $1.56 \pm 0.15$ | $2.42^{+0.23}_{-0.23}$ | $0.82 \pm 0.12$ | $1.29^{+0.19}_{-0.19}$ | $1.95 \pm 0.20$ | $3.41^{+0.33}_{-0.37}$ | $0.95 \pm 0.15$ | $1.59^{+0.25}_{-0.25}$ | $0.36 \pm 0.06$  | $0.59^{+0.11}_{-0.10}$ |

Table 2: Integrated  $F(\lambda)$  and de-reddened  $F_d(\lambda)$  line fluxes (relative to  $H\beta = 100$ ) for the PN NGC 2792, its hosting knots (K1, K2, K3, K4), and a control spectrum.

| $\lambda(\text{\AA})$ | Ion      | Entire nebula    |                         | K1              |                         | K2               |                        | K3              |                        | K4               |                         | Control spectrum |                         |
|-----------------------|----------|------------------|-------------------------|-----------------|-------------------------|------------------|------------------------|-----------------|------------------------|------------------|-------------------------|------------------|-------------------------|
|                       |          | $F(\lambda)$     | $F_d(\lambda)$          | $F(\lambda)$    | $F_d(\lambda)$          | $F(\lambda)$     | $F_d(\lambda)$         | $F(\lambda)$    | $F_d(\lambda)$         | $F(\lambda)$     | $F_d(\lambda)$          | $F(\lambda)$     | $F_d(\lambda)$          |
| 3721.94               | H I      | $0.95 \pm 0.09$  | $1.69^{+0.14}_{-0.15}$  | $0.91 \pm 0.12$ | $1.39^{+0.18}_{-0.18}$  | $0.87 \pm 0.12$  | $1.36^{+0.19}_{-0.19}$ | $0.95 \pm 0.12$ | $1.66^{+0.20}_{-0.20}$ | $0.93 \pm 0.15$  | $1.55^{+0.25}_{-0.25}$  | $1.29 \pm 0.06$  | $2.12^{+0.11}_{-0.11}$  |
| 3726.03               | [O II]   | $3.09 \pm 0.18$  | $5.39^{+0.31}_{-0.31}$  | $7.89 \pm 0.40$ | $12.21^{+0.63}_{-0.63}$ | $4.06 \pm 0.15$  | $6.36^{+0.23}_{-0.23}$ | $5.63 \pm 0.59$ | $9.82^{+1.01}_{-1.12}$ | $3.25 \pm 0.31$  | $5.40^{+0.51}_{-0.51}$  | $3.17 \pm 0.12$  | $5.20^{+0.19}_{-0.19}$  |
| 3728.82               | [O II]   | $2.23 \pm 0.19$  | $3.88^{+0.30}_{-0.33}$  | $5.41 \pm 0.32$ | $8.36^{+0.48}_{-0.52}$  | $2.55 \pm 0.12$  | $3.99^{+0.19}_{-0.19}$ | $3.67 \pm 0.45$ | $6.42^{+0.78}_{-0.80}$ | $1.95 \pm 0.17$  | $3.23^{+0.27}_{-0.29}$  | $2.29 \pm 0.11$  | $3.74^{+0.18}_{-0.19}$  |
| 3734.37               | H I      | $1.62 \pm 0.12$  | $2.54^{+0.20}_{-0.21}$  | $1.23 \pm 0.21$ | $1.90^{+0.32}_{-0.33}$  | $1.27 \pm 0.18$  | $1.97^{+0.27}_{-0.28}$ | $1.90 \pm 0.34$ | $3.32^{+0.59}_{-0.60}$ | $1.51 \pm 0.15$  | $2.49^{+0.24}_{-0.26}$  | $1.41 \pm 0.12$  | $2.29^{+0.19}_{-0.21}$  |
| 3750.15               | H I      | $1.94 \pm 0.10$  | $3.02^{+0.17}_{-0.17}$  | $1.85 \pm 0.21$ | $2.82^{+0.31}_{-0.34}$  | $1.72 \pm 0.15$  | $2.67^{+0.23}_{-0.23}$ | $2.44 \pm 0.34$ | $4.24^{+0.60}_{-0.58}$ | $2.02 \pm 0.18$  | $3.33^{+0.29}_{-0.30}$  | $1.80 \pm 0.04$  | $2.93^{+0.07}_{-0.07}$  |
| 3754.69               | O III    | $1.00 \pm 0.09$  | $1.64^{+0.02}_{-0.02}$  | $0.94 \pm 0.19$ | $1.44^{+0.02}_{-0.02}$  | $0.90 \pm 0.10$  | $1.39^{+0.01}_{-0.01}$ | $1.28 \pm 0.24$ | $2.22^{+0.02}_{-0.02}$ | $1.22 \pm 0.11$  | $2.01^{+0.01}_{-0.01}$  | $0.88 \pm 0.05$  | $1.42^{+0.01}_{-0.01}$  |
| 3759.87               | O III    | $3.51 \pm 0.10$  | $5.48^{+0.18}_{-0.18}$  | $3.29 \pm 0.47$ | $5.04^{+0.72}_{-0.72}$  | $3.50 \pm 0.15$  | $5.49^{+0.20}_{-0.30}$ | $4.83 \pm 0.34$ | $8.36^{+0.60}_{-0.60}$ | $3.93 \pm 0.20$  | $6.46^{+0.33}_{-0.33}$  | $3.21 \pm 0.11$  | $5.20^{+0.18}_{-0.18}$  |
| 3770.63               | H I      | $2.48 \pm 0.10$  | $4.04^{+0.18}_{-0.18}$  | $2.56 \pm 0.37$ | $3.90^{+0.57}_{-0.57}$  | $2.28 \pm 0.18$  | $3.52^{+0.27}_{-0.27}$ | $3.21 \pm 0.46$ | $5.54^{+0.79}_{-0.80}$ | $2.44 \pm 0.12$  | $4.00^{+0.19}_{-0.19}$  | $2.43 \pm 0.06$  | $3.93^{+0.10}_{-0.10}$  |
| 3774.02               | O III    | $0.17 \pm 0.07$  | $0.38^{+0.11}_{-0.11}$  |                 |                         |                  |                        |                 |                        |                  |                         |                  |                         |
| 3791.27               | O III    | $0.41 \pm 0.05$  | $0.48^{+0.08}_{-0.08}$  | $0.40 \pm 0.10$ | $0.60^{+0.21}_{-0.20}$  | $0.44 \pm 0.10$  | $0.67^{+0.15}_{-0.16}$ | $0.74 \pm 0.22$ | $1.27^{+0.39}_{-0.39}$ | $0.54 \pm 0.11$  | $0.87^{+0.18}_{-0.17}$  | $0.40 \pm 0.05$  | $0.64^{+0.15}_{-0.16}$  |
| 3797.90               | H I      | $3.38 \pm 0.14$  | $5.42^{+0.23}_{-0.23}$  | $3.12 \pm 0.33$ | $4.73^{+0.50}_{-0.50}$  | $3.05 \pm 0.14$  | $4.67^{+0.21}_{-0.21}$ | $4.62 \pm 0.35$ | $7.86^{+0.58}_{-0.63}$ | $3.70 \pm 0.23$  | $6.01^{+0.37}_{-0.37}$  | $3.32 \pm 0.10$  | $5.30^{+0.16}_{-0.16}$  |
| 3813.50               | He II    | $0.31 \pm 0.05$  | $0.49^{+0.08}_{-0.07}$  |                 |                         |                  |                        |                 |                        |                  |                         |                  |                         |
| 3819.62               | He I     | $0.38 \pm 0.05$  | $0.44^{+0.08}_{-0.08}$  | $0.54 \pm 0.12$ | $0.82^{+0.19}_{-0.19}$  | $0.31 \pm 0.07$  | $0.47^{+0.11}_{-0.10}$ |                 |                        | $0.31 \pm 0.08$  | $0.50^{+0.13}_{-0.13}$  | $0.29 \pm 0.04$  | $0.46^{+0.06}_{-0.06}$  |
| 3833.80               | He II    | $0.34 \pm 0.09$  | $0.50^{+0.13}_{-0.14}$  |                 |                         |                  |                        |                 |                        |                  |                         |                  |                         |
| 3835.39               | H I      | $4.49 \pm 0.09$  | $7.31^{+0.17}_{-0.17}$  | $4.61 \pm 0.21$ | $6.89^{+0.33}_{-0.33}$  | $4.32 \pm 0.19$  | $6.53^{+0.28}_{-0.28}$ | $6.03 \pm 0.32$ | $10^{+0.55}_{-0.55}$   | $4.66 \pm 0.19$  | $7.44^{+0.31}_{-0.31}$  | $4.52 \pm 0.07$  | $7.12^{+0.11}_{-0.11}$  |
| 3868.75               | [Ne III] | $54.36 \pm 0.61$ | $85.60^{+1.40}_{-1.40}$ | $71 \pm 0.27$   | $104^{+1.00}_{-1.00}$   | $57.20 \pm 0.34$ | $85^{+0.66}_{-0.66}$   | $63 \pm 0.77$   | $105^{+1.00}_{-1.00}$  | $53.54 \pm 0.20$ | $84.53^{+0.56}_{-0.56}$ | $53.40 \pm 0.31$ | $83.20^{+0.58}_{-0.58}$ |
| 3888.65               | He I     | $2.33 \pm 0.17$  | $3.78^{+0.27}_{-0.27}$  | $5.05 \pm 0.26$ | $7.43^{+0.38}_{-0.38}$  | $3.85 \pm 0.17$  | $5.71^{+0.25}_{-0.25}$ | $3.10 \pm 0.36$ | $5.09^{+0.60}_{-0.58}$ | $2.02 \pm 0.32$  | $3.17^{+0.49}_{-0.49}$  | $2.52 \pm 0.15$  | $3.90^{+0.23}_{-0.23}$  |

Table 2: Integrated  $F(\lambda)$  and de-reddened  $F_d(\lambda)$  line fluxes (relative to  $H\beta = 100$ ) for the PN NGC 2792, its hosting knots (K1, K2, K3, K4), and a control spectrum.

| $\lambda(\text{\AA})$ | Ion      | Entire nebula    |                         | K1              |                        | K2               |                        | K3              |                        | K4               |                         | Control spectrum |                         |
|-----------------------|----------|------------------|-------------------------|-----------------|------------------------|------------------|------------------------|-----------------|------------------------|------------------|-------------------------|------------------|-------------------------|
|                       |          | $F(\lambda)$     | $F_d(\lambda)$          | $F(\lambda)$    | $F_d(\lambda)$         | $F(\lambda)$     | $F_d(\lambda)$         | $F(\lambda)$    | $F_d(\lambda)$         | $F(\lambda)$     | $F_d(\lambda)$          | $F(\lambda)$     | $F_d(\lambda)$          |
| 3889.05               | H I      | $6.56 \pm 0.17$  | $10.49^{+0.29}_{-0.29}$ | $6.76 \pm 0.26$ | $9.94^{+0.39}_{-0.39}$ | $5.81 \pm 0.17$  | $8.63^{+0.25}_{-0.25}$ | $9.03 \pm 0.36$ | $15^{+0.59}_{-0.59}$   | $6.24 \pm 0.32$  | $9.78^{+0.50}_{-0.50}$  | $6.39 \pm 0.15$  | $9.89^{+0.23}_{-0.23}$  |
| 3923.48               | He II    | $0.49 \pm 0.05$  | $0.76^{+0.07}_{-0.08}$  | $0.46 \pm 0.10$ | $0.67^{+0.15}_{-0.14}$ | $0.43 \pm 0.06$  | $0.63^{+0.09}_{-0.10}$ | $0.90 \pm 0.15$ | $1.45^{+0.24}_{-0.24}$ | $0.60 \pm 0.12$  | $0.92^{+0.19}_{-0.19}$  | $0.47 \pm 0.04$  | $0.72^{+0.06}_{-0.06}$  |
| 3967.46               | [Ne III] | $17.56 \pm 0.29$ | $26.60^{+0.52}_{-0.52}$ | $22 \pm 0.29$   | $32^{+0.51}_{-0.51}$   | $18.40 \pm 0.41$ | $27^{+0.61}_{-0.61}$   | $21 \pm 0.42$   | $34^{+0.70}_{-0.70}$   | $17.10 \pm 0.41$ | $25.97^{+0.63}_{-0.63}$ | $17.29 \pm 0.14$ | $25.92^{+0.23}_{-0.23}$ |
| 3970.07               | H I      | $10.51 \pm 0.25$ | $16.24^{+0.42}_{-0.42}$ | $11 \pm 0.28$   | $15^{+0.42}_{-0.42}$   | $10.00 \pm 0.37$ | $14^{+0.53}_{-0.53}$   | $15 \pm 0.51$   | $24^{+0.83}_{-0.83}$   | $10.82 \pm 0.39$ | $16.40^{+0.60}_{-0.60}$ | $10.64 \pm 0.10$ | $15.94^{+0.16}_{-0.16}$ |
| 4026.08               | N II     | $0.97 \pm 0.09$  | $1.43^{+0.01}_{-0.01}$  | $1 \pm 0.16$    | $1.34^{+0.01}_{-0.01}$ | $0.86 \pm 0.14$  | $1.21^{+0.01}_{-0.00}$ | $1 \pm 0.20$    | $1.83^{+0.01}_{-0.01}$ | $1.07 \pm 0.13$  | $1.58^{+0.01}_{-0.01}$  | $1.00 \pm 0.10$  | $1.46^{+0.01}_{-0.01}$  |
| 4067.94               | C III    | $0.21 \pm 0.03$  | $0.29^{+0.05}_{-0.05}$  |                 |                        |                  |                        |                 |                        |                  |                         |                  |                         |
| 4068.92               | C III    | $0.29 \pm 0.03$  | $0.52^{+0.04}_{-0.04}$  | $0.39 \pm 0.09$ | $0.54^{+0.13}_{-0.13}$ | $0.25 \pm 0.06$  | $0.35^{+0.08}_{-0.08}$ | $0.77 \pm 0.14$ | $1.10^{+0.22}_{-0.22}$ | $0.32 \pm 0.08$  | $0.47^{+0.12}_{-0.12}$  | $0.33 \pm 0.04$  | $0.47^{+0.05}_{-0.05}$  |
| 4070.26               | C III    | $0.39 \pm 0.03$  | $0.57^{+0.04}_{-0.04}$  | $0.31 \pm 0.08$ | $0.43^{+0.11}_{-0.11}$ | $0.26 \pm 0.06$  | $0.37^{+0.08}_{-0.08}$ | $0.55 \pm 0.12$ | $0.83^{+0.18}_{-0.18}$ | $0.46 \pm 0.08$  | $0.66^{+0.12}_{-0.12}$  | $0.35 \pm 0.03$  | $0.50^{+0.04}_{-0.04}$  |
| 4097.26               | O II     | $1.16 \pm 0.06$  | $1.66^{+0.02}_{-0.01}$  | $1.43 \pm 0.11$ | $1.95^{+0.02}_{-0.01}$ | $1.35 \pm 0.06$  | $1.86^{+0.01}_{-0.01}$ | $1.58 \pm 0.16$ | $2.36^{+0.01}_{-0.01}$ | $1.31 \pm 0.11$  | $1.88^{+0.01}_{-0.01}$  | $1.19 \pm 0.08$  | $1.69^{+0.01}_{-0.01}$  |
| 4100.04               | He II    | $0.87 \pm 0.14$  | $1.40^{+0.20}_{-0.20}$  | $0.81 \pm 0.11$ | $1.11^{+0.15}_{-0.15}$ | $0.82 \pm 0.07$  | $1.12^{+0.09}_{-0.10}$ | $1.29 \pm 0.39$ | $1.92^{+0.58}_{-0.58}$ | $1.07 \pm 0.15$  | $1.54^{+0.21}_{-0.22}$  | $0.94 \pm 0.08$  | $1.33^{+0.10}_{-0.11}$  |
| 4101.74               | H I      | $18.98 \pm 0.26$ | $26.82^{+0.44}_{-0.43}$ | $20 \pm 0.22$   | $27^{+0.36}_{-0.35}$   | $18.00 \pm 0.20$ | $25^{+0.28}_{-0.28}$   | $26 \pm 0.55$   | $39^{+0.82}_{-0.82}$   | $19.11 \pm 0.27$ | $27.39^{+0.39}_{-0.39}$ | $18.50 \pm 0.20$ | $26.23^{+0.29}_{-0.29}$ |
| 4143.76               | He I     | $0.16 \pm 0.04$  | $0.25^{+0.05}_{-0.05}$  |                 |                        |                  |                        |                 |                        |                  |                         |                  |                         |
| 4186.90               | C III    | $0.28 \pm 0.04$  | $0.42^{+0.05}_{-0.06}$  | $0.41 \pm 0.05$ | $0.53^{+0.06}_{-0.07}$ | $0.30 \pm 0.04$  | $0.39^{+0.06}_{-0.06}$ | $0.51 \pm 0.09$ | $0.73^{+0.13}_{-0.13}$ | $0.36 \pm 0.07$  | $0.49^{+0.10}_{-0.10}$  | $0.29 \pm 0.02$  | $0.40^{+0.02}_{-0.02}$  |
| 4199.83               | He II    | $0.62 \pm 0.05$  | $0.79^{+0.06}_{-0.07}$  | $0.91 \pm 0.10$ | $1.19^{+0.12}_{-0.13}$ | $0.91 \pm 0.07$  | $1.20^{+0.09}_{-0.09}$ | $1.73 \pm 0.13$ | $2.45^{+0.01}_{-0.01}$ | $2.82 \pm 0.42$  | $3.87^{+0.01}_{-0.01}$  | $1.29 \pm 0.05$  | $1.75^{+0.01}_{-0.01}$  |
| 4200.10               | N III    | $0.75 \pm 0.05$  | $0.99^{+0.07}_{-0.07}$  |                 |                        |                  |                        |                 |                        |                  |                         |                  |                         |
| 4267.15               | C II     | $0.32 \pm 0.05$  | $0.47^{+0.06}_{-0.06}$  | $0.49 \pm 0.06$ | $0.63^{+0.08}_{-0.08}$ | $0.52 \pm 0.03$  | $0.67^{+0.03}_{-0.04}$ | $0.42 \pm 0.11$ | $0.58^{+0.15}_{-0.15}$ | $0.43 \pm 0.07$  | $0.58^{+0.09}_{-0.09}$  | $0.38 \pm 0.02$  | $0.50^{+0.02}_{-0.02}$  |
| 4338.67               | He II    | $1.59 \pm 0.64$  | $2.68^{+0.83}_{-0.82}$  | $1.53 \pm 0.17$ | $1.90^{+0.21}_{-0.21}$ | $1.62 \pm 0.18$  | $2.02^{+0.22}_{-0.22}$ | $2.33 \pm 0.28$ | $3.06^{+0.36}_{-0.40}$ | $2.10 \pm 0.22$  | $2.69^{+0.27}_{-0.30}$  | $1.94 \pm 0.10$  | $2.47^{+0.13}_{-0.13}$  |

Table 2: Integrated  $F(\lambda)$  and de-reddened  $F_d(\lambda)$  line fluxes (relative to  $H\beta = 100$ ) for the PN NGC 2792, its hosting knots (K1, K2, K3, K4), and a control spectrum.

| $\lambda(\text{\AA})$ | Ion      | Entire nebula    |                         | K1              |                        | K2               |                        | K3              |                        | K4               |                         | Control spectrum |                         |
|-----------------------|----------|------------------|-------------------------|-----------------|------------------------|------------------|------------------------|-----------------|------------------------|------------------|-------------------------|------------------|-------------------------|
|                       |          | $F(\lambda)$     | $F_d(\lambda)$          | $F(\lambda)$    | $F_d(\lambda)$         | $F(\lambda)$     | $F_d(\lambda)$         | $F(\lambda)$    | $F_d(\lambda)$         | $F(\lambda)$     | $F_d(\lambda)$          | $F(\lambda)$     | $F_d(\lambda)$          |
| 4340.47               | H I      | $37.23 \pm 0.67$ | $48.28^{+0.86}_{-0.86}$ | $39 \pm 0.18$   | $48^{+0.33}_{-0.33}$   | $36.20 \pm 0.19$ | $45^{+0.25}_{-0.25}$   | $44 \pm 0.29$   | $57^{+0.40}_{-0.40}$   | $39.12 \pm 0.20$ | $50.29^{+0.28}_{-0.28}$ | $37.84 \pm 0.10$ | $48.30^{+0.10}_{-0.10}$ |
| 4363.21               | [O III]  | $15.22 \pm 0.40$ | $20.11^{+0.53}_{-0.53}$ | $16 \pm 0.13$   | $20^{+0.19}_{-0.19}$   | $15.60 \pm 0.22$ | $19^{+0.37}_{-0.27}$   | $15 \pm 0.37$   | $20^{+0.49}_{-0.49}$   | $16.20 \pm 0.15$ | $20.61^{+0.20}_{-0.20}$ | $15.56 \pm 0.10$ | $19.66^{+0.14}_{-0.14}$ |
| 4471.50               | He I     | $1.12 \pm 0.04$  | $1.37^{+0.05}_{-0.05}$  | $2.16 \pm 0.06$ | $2.54^{+0.07}_{-0.07}$ | $1.76 \pm 0.06$  | $2.08^{+0.06}_{-0.06}$ | $1.42 \pm 0.08$ | $1.75^{+0.10}_{-0.10}$ | $1.25 \pm 0.05$  | $1.51^{+0.07}_{-0.07}$  | $1.21 \pm 0.03$  | $1.45^{+0.04}_{-0.03}$  |
| 4491.07               | C II     | $0.08 \pm 0.03$  | $0.10^{+0.00}_{-0.00}$  |                 |                        |                  |                        |                 |                        |                  |                         |                  |                         |
| 4541.59               | He II    | $2.86 \pm 0.03$  | $3.36^{+0.04}_{-0.04}$  | $1.96 \pm 0.06$ | $2.24^{+0.07}_{-0.07}$ | $2.37 \pm 0.04$  | $2.71^{+0.05}_{-0.05}$ | $2.64 \pm 0.09$ | $3.13^{+0.11}_{-0.11}$ | $2.82 \pm 0.03$  | $3.29^{+0.04}_{-0.04}$  | $2.80 \pm 0.03$  | $3.25^{+0.03}_{-0.03}$  |
| 4634.14               | N III    | $1.11 \pm 0.10$  | $1.28^{+0.10}_{-0.11}$  | $1.08 \pm 0.07$ | $1.18^{+0.08}_{-0.08}$ | $1.26 \pm 0.06$  | $1.39^{+0.06}_{-0.06}$ | $0.88 \pm 0.10$ | $0.99^{+0.11}_{-0.11}$ | $1.15 \pm 0.14$  | $1.28^{+0.15}_{-0.17}$  | $0.93 \pm 0.05$  | $1.03^{+0.06}_{-0.06}$  |
| 4640.64               | N III    | $1.94 \pm 0.07$  | $2.15^{+0.08}_{-0.08}$  | $2.29 \pm 0.08$ | $2.52^{+0.08}_{-0.08}$ | $2.72 \pm 0.08$  | $2.99^{+0.09}_{-0.09}$ | $1.80 \pm 0.08$ | $2.03^{+0.09}_{-0.09}$ | $2.58 \pm 0.23$  | $2.87^{+0.25}_{-0.28}$  | $1.89 \pm 0.06$  | $2.10^{+0.07}_{-0.07}$  |
| 4641.81               | O II     | $0.23 \pm 0.07$  | $0.25^{+0.00}_{-0.00}$  | $0.36 \pm 0.08$ | $0.40^{+0.00}_{-0.00}$ | $0.39 \pm 0.07$  | $0.42^{+0.00}_{-0.00}$ | $0.29 \pm 0.07$ | $0.33^{+0.00}_{-0.00}$ | $0.18 \pm 0.05$  | $0.20^{+0.00}_{-0.00}$  | $0.22 \pm 0.06$  | $0.24^{+0.00}_{-0.00}$  |
| 4647.42               | C III    | $0.37 \pm 0.02$  | $0.45^{+0.03}_{-0.03}$  | $0.31 \pm 0.02$ | $0.34^{+0.03}_{-0.03}$ | $0.41 \pm 0.04$  | $0.44^{+0.04}_{-0.04}$ | $0.42 \pm 0.08$ | $0.47^{+0.09}_{-0.09}$ | $0.39 \pm 0.06$  | $0.24^{+0.07}_{-0.07}$  | $0.42 \pm 0.03$  | $0.47^{+0.03}_{-0.03}$  |
| 4650.25               | C III    | $0.19 \pm 0.03$  | $0.24^{+0.03}_{-0.03}$  | $0.17 \pm 0.03$ | $0.19^{+0.04}_{-0.03}$ | $0.14 \pm 0.03$  | $0.15^{+0.03}_{-0.03}$ | $0.31 \pm 0.07$ | $0.35^{+0.08}_{-0.08}$ | $0.24 \pm 0.04$  | $0.24^{+0.04}_{-0.05}$  | $0.26 \pm 0.01$  | $0.29^{+0.02}_{-0.02}$  |
| 4658.10               | [Fe III] | $0.26 \pm 0.05$  | $0.32^{+0.06}_{-0.06}$  | $0.16 \pm 0.05$ | $0.18^{+0.05}_{-0.05}$ | $0.27 \pm 0.04$  | $0.30^{+0.05}_{-0.05}$ | $0.32 \pm 0.08$ | $0.35^{+0.09}_{-0.09}$ | $0.20 \pm 0.06$  | $0.24^{+0.06}_{-0.06}$  | $0.35 \pm 0.03$  | $0.39^{+0.03}_{-0.03}$  |
| 4658.64               | C IV     | $0.33 \pm 0.05$  | $0.33^{+0.06}_{-0.06}$  | $0.17 \pm 0.04$ | $0.19^{+0.04}_{-0.04}$ | $0.16 \pm 0.04$  | $0.18^{+0.04}_{-0.04}$ | $0.28 \pm 0.07$ | $0.31^{+0.08}_{-0.08}$ | $0.40 \pm 0.05$  | $0.24^{+0.05}_{-0.06}$  | $0.17 \pm 0.03$  | $0.18^{+0.04}_{-0.04}$  |
| 4685.68               | He II    | $87.04 \pm 0.66$ | $95.97^{+0.75}_{-0.75}$ | $62 \pm 0.56$   | $66^{+0.61}_{-0.61}$   | $72.90 \pm 0.47$ | $79^{+0.51}_{-0.51}$   | $82 \pm 1.96$   | $90^{+2.10}_{-2.10}$   | $87.39 \pm 0.54$ | $94.80^{+0.59}_{-0.59}$ | $87.23 \pm 0.36$ | $94.80^{+0.10}_{-0.10}$ |
| 4711.37               | [Ar IV]  | $11.90 \pm 0.16$ | $12.73^{+0.18}_{-0.18}$ | $8.66 \pm 0.12$ | $9.21^{+0.13}_{-0.13}$ | $9.36 \pm 0.12$  | $9.98^{+0.13}_{-0.13}$ | $11 \pm 0.46$   | $12^{+0.49}_{-0.49}$   | $11.02 \pm 0.17$ | $12.54^{+0.18}_{-0.18}$ | $11.69 \pm 0.16$ | $12.54^{+0.17}_{-0.17}$ |
| 4714.17               | [Ne IV]  | $0.76 \pm 0.06$  | $0.77^{+0.06}_{-0.06}$  | $0.49 \pm 0.04$ | $0.52^{+0.04}_{-0.04}$ | $0.55 \pm 0.04$  | $0.59^{+0.04}_{-0.04}$ | $0.60 \pm 0.11$ | $0.66^{+0.11}_{-0.11}$ | $0.60 \pm 0.07$  | $0.24^{+0.07}_{-0.07}$  | $0.76 \pm 0.05$  | $0.81^{+0.05}_{-0.05}$  |
| 4715.66               | [Ne IV]  | $0.23 \pm 0.02$  | $0.23^{+0.02}_{-0.03}$  | $0.14 \pm 0.03$ | $0.14^{+0.03}_{-0.03}$ | $0.14 \pm 0.02$  | $0.15^{+0.02}_{-0.02}$ | $0.18 \pm 0.04$ | $0.20^{+0.05}_{-0.05}$ | $0.21 \pm 0.05$  | $0.24^{+0.05}_{-0.06}$  | $0.19 \pm 0.02$  | $0.20^{+0.02}_{-0.03}$  |
| 4724.15               | [Ne IV]  | $0.81 \pm 0.04$  | $0.88^{+0.04}_{-0.04}$  | $0.47 \pm 0.04$ | $0.50^{+0.04}_{-0.05}$ | $0.62 \pm 0.06$  | $0.66^{+0.06}_{-0.06}$ | $0.63 \pm 0.12$ | $0.67^{+0.13}_{-0.13}$ | $0.74 \pm 0.04$  | $0.24^{+0.04}_{-0.05}$  | $0.79 \pm 0.03$  | $0.85^{+0.04}_{-0.04}$  |

Table 2: Integrated  $F(\lambda)$  and de-reddened  $F_d(\lambda)$  line fluxes (relative to  $H\beta = 100$ ) for the PN NGC 2792, its hosting knots (K1, K2, K3, K4), and a control spectrum.

| $\lambda(\text{\AA})$ | Ion      | Entire nebula       |                             | K1              |                          | K2                 |                          | K3               |                          | K4                 |                          | Control spectrum   |                             |
|-----------------------|----------|---------------------|-----------------------------|-----------------|--------------------------|--------------------|--------------------------|------------------|--------------------------|--------------------|--------------------------|--------------------|-----------------------------|
|                       |          | $F(\lambda)$        | $F_d(\lambda)$              | $F(\lambda)$    | $F_d(\lambda)$           | $F(\lambda)$       | $F_d(\lambda)$           | $F(\lambda)$     | $F_d(\lambda)$           | $F(\lambda)$       | $F_d(\lambda)$           | $F(\lambda)$       | $F_d(\lambda)$              |
| 4725.62               | [Ne IV]  | $0.59 \pm 0.03$     | $0.65^{+0.03}_{-0.03}$      | $0.40 \pm 0.04$ | $0.42^{+0.04}_{-0.04}$   | $0.48 \pm 0.05$    | $0.51^{+0.05}_{-0.05}$   | $0.49 \pm 0.09$  | $0.53^{+0.10}_{-0.10}$   | $0.55 \pm 0.04$    | $0.24^{+0.05}_{-0.05}$   | $0.64 \pm 0.04$    | $0.68^{+0.04}_{-0.04}$      |
| 4740.17               | [Ar IV]  | $10.57 \pm 0.12$    | $11.05^{+0.13}_{-0.13}$     | $7.81 \pm 0.20$ | $8.22^{+0.21}_{-0.21}$   | $8.79 \pm 0.14$    | $9.26^{+0.14}_{-0.14}$   | $9.85 \pm 0.38$  | $11^{+0.39}_{-0.41}$     | $10.07 \pm 0.14$   | $0.24^{+0.15}_{-0.15}$   | $10.35 \pm 0.22$   | $10.96^{+0.24}_{-0.24}$     |
| 4859.32               | He II    | $6.51 \pm 1.55$     | $5.14^{+1.57}_{-1.57}$      | $3.80 \pm 0.48$ | $3.81^{+0.48}_{-0.48}$   | $4.35 \pm 0.55$    | $4.36^{+0.54}_{-0.55}$   | $4.66 \pm 0.39$  | $4.64^{+0.37}_{-0.40}$   | $4.91 \pm 0.4$     | $0.24^{+0.40}_{-0.40}$   | $5.30 \pm 0.51$    | $5.30^{+0.53}_{-0.51}$      |
| 4861.33               | H I      | $100.00 \pm 1.95$   | $100.00^{+2.00}_{-2.00}$    | $100 \pm 0.71$  | $100^{+0.72}_{-0.72}$    | $100.00 \pm 0.58$  | $100^{+0.58}_{-0.58}$    | $100 \pm 0.49$   | $100^{+0.49}_{-0.49}$    | $100.00 \pm 0.60$  | $0.24^{+0.61}_{-0.61}$   | $100.00 \pm 0.31$  | $100.00^{+0.10}_{-0.10}$    |
| 4921.93               | He I     | $0.18 \pm 0.07$     | $0.22^{+0.07}_{-0.07}$      | $0.68 \pm 0.04$ | $0.66^{+0.04}_{-0.04}$   | $0.57 \pm 0.01$    | $0.55^{+0.01}_{-0.01}$   | $0.46 \pm 0.05$  | $0.44^{+0.04}_{-0.05}$   | $0.41 \pm 0.03$    | $0.24^{+0.03}_{-0.03}$   | $0.38 \pm 0.02$    | $0.37^{+0.02}_{-0.02}$      |
| 4958.91               | [O III]  | $424.34 \pm 5.4$    | $399.00^{+5.00}_{-5.00}$    | $482 \pm 3.31$  | $463^{+3.00}_{-3.00}$    | $432.00 \pm 3.25$  | $415^{+3.00}_{-3.00}$    | $431 \pm 10.07$  | $409^{+10.00}_{-10.00}$  | $412.37 \pm 3.78$  | $0.24^{+4.00}_{-4.00}$   | $404.41 \pm 2.70$  | $386.00^{+3.00}_{-3.00}$    |
| 5006.84               | [O III]  | $1281.53 \pm 11.41$ | $1200.00^{+10.00}_{-10.00}$ | $1507 \pm 8.87$ | $1420^{+10.00}_{-10.00}$ | $1350.00 \pm 8.28$ | $1270^{+10.00}_{-10.00}$ | $1344 \pm 23.42$ | $1240^{+20.00}_{-20.00}$ | $1266.73 \pm 6.98$ | $0.24^{+10.00}_{-10.00}$ | $1243.56 \pm 6.80$ | $1160.00^{+10.00}_{-10.00}$ |
| 5015.68               | He I     | $0.39 \pm 0.04$     | $0.34^{+0.04}_{-0.04}$      | $0.83 \pm 0.07$ | $0.77^{+0.06}_{-0.07}$   | $0.70 \pm 0.04$    | $0.66^{+0.03}_{-0.04}$   | $0.42 \pm 0.08$  | $0.38^{+0.08}_{-0.08}$   | $0.41 \pm 0.06$    | $0.24^{+0.05}_{-0.06}$   | $0.36 \pm 0.02$    | $0.34^{+0.02}_{-0.02}$      |
| 5191.82               | [Ar III] | $0.17 \pm 0.03$     | $0.16^{+0.03}_{-0.02}$      | $0.35 \pm 0.04$ | $0.30^{+0.03}_{-0.04}$   | $0.26 \pm 0.03$    | $0.23^{+0.03}_{-0.03}$   | $0.40 \pm 0.05$  | $0.34^{+0.04}_{-0.04}$   | $0.30 \pm 0.04$    | $0.24^{+0.03}_{-0.03}$   | $0.19 \pm 0.01$    | $0.16^{+0.01}_{-0.01}$      |
| 5345.90               | [Kr IV]  | $0.26 \pm 0.02$     | $0.20^{+0.02}_{-0.02}$      | $0.27 \pm 0.03$ | $0.22^{+0.02}_{-0.03}$   | $0.27 \pm 0.02$    | $0.22^{+0.01}_{-0.01}$   | $0.28 \pm 0.05$  | $0.22^{+0.04}_{-0.04}$   | $0.26 \pm 0.03$    | $0.24^{+0.02}_{-0.03}$   | $0.26 \pm 0.02$    | $0.21^{+0.01}_{-0.01}$      |
| 5411.52               | He II    | $9.48 \pm 0.08$     | $7.28^{+0.08}_{-0.08}$      | $7.16 \pm 0.10$ | $5.71^{+0.09}_{-0.09}$   | $8.35 \pm 0.05$    | $6.62^{+0.05}_{-0.05}$   | $8.80 \pm 0.16$  | $6.50^{+0.13}_{-0.13}$   | $9.20 \pm 0.08$    | $0.24^{+0.07}_{-0.07}$   | $9.45 \pm 0.05$    | $7.31^{+0.04}_{-0.04}$      |
| 5517.66               | [Cl III] | $0.76 \pm 0.04$     | $0.58^{+0.03}_{-0.03}$      | $0.95 \pm 0.04$ | $0.73^{+0.03}_{-0.03}$   | $0.72 \pm 0.05$    | $0.55^{+0.03}_{-0.03}$   | $1.04 \pm 0.04$  | $0.74^{+0.03}_{-0.03}$   | $0.79 \pm 0.05$    | $0.24^{+0.03}_{-0.03}$   | $0.79 \pm 0.03$    | $0.58^{+0.03}_{-0.03}$      |
| 5537.60               | [Cl III] | $0.68 \pm 0.04$     | $0.51^{+0.03}_{-0.03}$      | $0.89 \pm 0.08$ | $0.68^{+0.06}_{-0.06}$   | $0.74 \pm 0.05$    | $0.56^{+0.04}_{-0.04}$   | $0.94 \pm 0.06$  | $0.66^{+0.04}_{-0.05}$   | $0.80 \pm 0.05$    | $0.24^{+0.04}_{-0.03}$   | $0.70 \pm 0.04$    | $0.52^{+0.03}_{-0.03}$      |
| 5754.60               | [N II]   | $0.15 \pm 0.01$     | $0.10^{+0.01}_{-0.01}$      | $0.38 \pm 0.03$ | $0.27^{+0.02}_{-0.02}$   | $0.19 \pm 0.02$    | $0.14^{+0.01}_{-0.01}$   | $0.36 \pm 0.04$  | $0.24^{+0.03}_{-0.03}$   | $0.17 \pm 0.02$    | $0.24^{+0.02}_{-0.02}$   | $0.15 \pm 0.01$    | $0.10^{+0.01}_{-0.01}$      |
| 5801.51               | C IV     | $0.49 \pm 0.05$     | $0.34^{+0.03}_{-0.03}$      | $0.4 \pm 0.07$  | $0.29^{+0.04}_{-0.04}$   | $0.34 \pm 0.07$    | $0.24^{+0.05}_{-0.05}$   | $0.6 \pm 0.16$   | $0.4^{+0.11}_{-0.11}$    | $0.55 \pm 0.08$    | $0.24^{+0.06}_{-0.06}$   | $0.72 \pm 0.03$    | $0.46^{+0.02}_{-0.02}$      |
| 5812.14               | C IV     | $0.33 \pm 0.03$     | $0.21^{+0.02}_{-0.02}$      | $0.16 \pm 0.05$ | $0.11^{+0.04}_{-0.04}$   | $0.21 \pm 0.04$    | $0.15^{+0.03}_{-0.03}$   | $0.41 \pm 0.08$  | $0.26^{+0.05}_{-0.05}$   | $0.31 \pm 0.03$    | $0.24^{+0.02}_{-0.03}$   | $0.32 \pm 0.02$    | $0.21^{+0.02}_{-0.02}$      |
| 5868.00               | [Kr IV]  | $0.34 \pm 0.04$     | $0.25^{+0.03}_{-0.03}$      | $0.32 \pm 0.06$ | $0.22^{+0.04}_{-0.04}$   | $0.32 \pm 0.05$    | $0.22^{+0.04}_{-0.04}$   | $0.43 \pm 0.09$  | $0.27^{+0.05}_{-0.05}$   | $0.38 \pm 0.04$    | $0.24^{+0.02}_{-0.03}$   | $0.39 \pm 0.04$    | $0.26^{+0.03}_{-0.03}$      |

Table 2: Integrated  $F(\lambda)$  and de-reddened  $F_d(\lambda)$  line fluxes (relative to  $H\beta = 100$ ) for the PN NGC 2792, its hosting knots (K1, K2, K3, K4), and a control spectrum.

| $\lambda(\text{\AA})$ | Ion     | Entire nebula     |                          | K1              |                        | K2                |                        | K3              |                        | K4                |                          | Control spectrum  |                          |
|-----------------------|---------|-------------------|--------------------------|-----------------|------------------------|-------------------|------------------------|-----------------|------------------------|-------------------|--------------------------|-------------------|--------------------------|
|                       |         | $F(\lambda)$      | $F_d(\lambda)$           | $F(\lambda)$    | $F_d(\lambda)$         | $F(\lambda)$      | $F_d(\lambda)$         | $F(\lambda)$    | $F_d(\lambda)$         | $F(\lambda)$      | $F_d(\lambda)$           | $F(\lambda)$      | $F_d(\lambda)$           |
| 5875.66               | He I    | $6.36 \pm 0.23$   | $4.02^{+0.16}_{-0.16}$   | $10 \pm 0.15$   | $7.00^{+0.12}_{-0.12}$ | $8.70 \pm 0.07$   | $5.99^{+0.05}_{-0.05}$ | $7.40 \pm 0.23$ | $4.63^{+0.15}_{-0.15}$ | $6.54 \pm 0.05$   | $0.24^{+0.04}_{-0.04}$   | $6.23 \pm 0.07$   | $4.12^{+0.05}_{-0.05}$   |
| 5931.78               | N II    | $0.15 \pm 0.01$   | $0.10^{+0.01}_{-0.01}$   | $0.14 \pm 0.03$ | $0.10^{+0.02}_{-0.02}$ | $0.11 \pm 0.01$   | $0.08^{+0.01}_{-0.01}$ | $0.19 \pm 0.03$ | $0.11^{+0.02}_{-0.02}$ |                   | $0.16 \pm 0.01$          | $0.16 \pm 0.01$   | $0.10^{+0.01}_{-0.01}$   |
| 6036.70               | He II   | $0.25 \pm 0.01$   | $0.15^{+0.01}_{-0.01}$   | $0.24 \pm 0.03$ | $0.16^{+0.02}_{-0.02}$ | $0.22 \pm 0.01$   | $0.15^{+0.01}_{-0.01}$ | $0.37 \pm 0.03$ | $0.22^{+0.02}_{-0.02}$ | $0.26 \pm 0.02$   | $0.16^{+0.01}_{-0.01}$   | $0.25 \pm 0.01$   | $0.16^{+0.01}_{-0.01}$   |
| 6074.10               | He II   | $0.31 \pm 0.01$   | $0.19^{+0.01}_{-0.01}$   | $0.26 \pm 0.03$ | $0.17^{+0.02}_{-0.02}$ | $0.26 \pm 0.02$   | $0.17^{+0.01}_{-0.01}$ | $0.27 \pm 0.05$ | $0.16^{+0.03}_{-0.03}$ | $0.31 \pm 0.02$   | $0.19^{+0.01}_{-0.01}$   | $0.31 \pm 0.01$   | $0.20^{+0.01}_{-0.01}$   |
| 6101.83               | [K IV]  | $0.97 \pm 0.01$   | $0.59^{+0.01}_{-0.01}$   | $0.77 \pm 0.04$ | $0.51^{+0.03}_{-0.03}$ | $0.75 \pm 0.02$   | $0.49^{+0.02}_{-0.02}$ | $1.26 \pm 0.09$ | $0.73^{+0.05}_{-0.05}$ | $0.97 \pm 0.04$   | $0.59^{+0.02}_{-0.02}$   | $0.99 \pm 0.03$   | $0.61^{+0.02}_{-0.02}$   |
| 6118.20               | He II   | $0.30 \pm 0.02$   | $0.20^{+0.01}_{-0.01}$   | $0.24 \pm 0.02$ | $0.15^{+0.02}_{-0.02}$ | $0.28 \pm 0.03$   | $0.18^{+0.02}_{-0.02}$ | $0.41 \pm 0.06$ | $0.23^{+0.04}_{-0.04}$ | $0.32 \pm 0.03$   | $0.19^{+0.02}_{-0.02}$   | $0.35 \pm 0.02$   | $0.21^{+0.01}_{-0.01}$   |
| 6170.69               | He II   | $0.44 \pm 0.01$   | $0.25^{+0.01}_{-0.01}$   | $0.34 \pm 0.03$ | $0.22^{+0.02}_{-0.02}$ | $0.35 \pm 0.02$   | $0.22^{+0.01}_{-0.01}$ | $0.56 \pm 0.03$ | $0.33^{+0.02}_{-0.02}$ | $0.38 \pm 0.03$   | $0.23^{+0.02}_{-0.02}$   | $0.42 \pm 0.02$   | $0.26^{+0.01}_{-0.01}$   |
| 6233.80               | He II   | $0.48 \pm 0.01$   | $0.28^{+0.01}_{-0.01}$   | $0.41 \pm 0.05$ | $0.26^{+0.03}_{-0.03}$ | $0.43 \pm 0.02$   | $0.27^{+0.02}_{-0.02}$ | $0.71 \pm 0.07$ | $0.39^{+0.04}_{-0.04}$ | $0.49 \pm 0.02$   | $0.29^{+0.01}_{-0.01}$   | $0.49 \pm 0.01$   | $0.29^{+0.01}_{-0.01}$   |
| 6300.30               | [O I]   | $0.07 \pm 0.01$   | $0.04^{+0.01}_{-0.01}$   | $0.89 \pm 0.11$ | $0.55^{+0.06}_{-0.07}$ | $0.70 \pm 0.11$   | $0.42^{+0.06}_{-0.07}$ | $0.91 \pm 0.24$ | $0.49^{+0.13}_{-0.13}$ | $0.09 \pm 0.02$   | $0.05^{+0.01}_{-0.01}$   | $0.12 \pm 0.02$   | $0.07^{+0.01}_{-0.01}$   |
| 6310.80               | He II   | $0.53 \pm 0.04$   | $0.31^{+0.02}_{-0.03}$   | $0.56 \pm 0.06$ | $0.34^{+0.03}_{-0.04}$ | $0.43 \pm 0.03$   | $0.26^{+0.02}_{-0.02}$ | $0.98 \pm 0.06$ | $0.53^{+0.03}_{-0.03}$ | $0.39 \pm 0.05$   | $0.22^{+0.03}_{-0.03}$   | $0.48 \pm 0.03$   | $0.28^{+0.02}_{-0.02}$   |
| 6312.10               | [S III] | $2.46 \pm 0.04$   | $1.39^{+0.03}_{-0.03}$   | $2.59 \pm 0.07$ | $1.60^{+0.04}_{-0.04}$ | $2.34 \pm 0.03$   | $1.43^{+0.02}_{-0.02}$ | $3.22 \pm 0.11$ | $1.73^{+0.06}_{-0.06}$ | $2.85 \pm 0.05$   | $1.63^{+0.03}_{-0.03}$   | $2.47 \pm 0.03$   | $1.43^{+0.02}_{-0.02}$   |
| 6363.77               | [O I]   |                   |                          | $0.26 \pm 0.05$ | $0.16^{+0.03}_{-0.03}$ | $0.20 \pm 0.05$   | $0.12^{+0.03}_{-0.03}$ |                 |                        |                   |                          |                   |                          |
| 6406.30               | He II   | $0.75 \pm 0.01$   | $0.41^{+0.01}_{-0.01}$   | $0.53 \pm 0.02$ | $0.32^{+0.01}_{-0.01}$ | $0.63 \pm 0.02$   | $0.37^{+0.01}_{-0.01}$ | $0.82 \pm 0.03$ | $0.43^{+0.01}_{-0.01}$ | $0.64 \pm 0.03$   | $0.36^{+0.02}_{-0.02}$   | $0.77 \pm 0.03$   | $0.43^{+0.02}_{-0.02}$   |
| 6527.11               | He II   | $0.96 \pm 0.02$   | $0.52^{+0.01}_{-0.01}$   | $0.75 \pm 0.12$ | $0.44^{+0.07}_{-0.07}$ | $0.75 \pm 0.08$   | $0.44^{+0.05}_{-0.05}$ | $1.27 \pm 0.13$ | $0.64^{+0.06}_{-0.07}$ | $1.01 \pm 0.04$   | $0.54^{+0.02}_{-0.02}$   | $0.96 \pm 0.06$   | $0.52^{+0.03}_{-0.03}$   |
| 6548.10               | [N II]  | $1.85 \pm 0.11$   | $0.97^{+0.06}_{-0.06}$   | $6.99 \pm 1.05$ | $4.07^{+0.62}_{-0.62}$ | $2.73 \pm 0.09$   | $1.57^{+0.05}_{-0.06}$ | $5.36 \pm 1.04$ | $2.68^{+0.52}_{-0.52}$ | $1.93 \pm 0.28$   | $1.03^{+0.15}_{-0.15}$   | $1.89 \pm 0.08$   | $1.03^{+0.04}_{-0.04}$   |
| 6560.10               | He II   | $22.55 \pm 0.73$  | $12.41^{+0.43}_{-0.43}$  | $17 \pm 2.83$   | $9.74^{+1.64}_{-1.65}$ | $15.70 \pm 2.36$  | $9.01^{+1.35}_{-1.34}$ | $29 \pm 2.30$   | $14^{+1.10}_{-1.20}$   | $24.02 \pm 0.75$  | $12.74^{+0.40}_{-0.40}$  | $23.47 \pm 1.25$  | $12.69^{+0.68}_{-0.68}$  |
| 6562.77               | H I     | $530.46 \pm 4.13$ | $281.00^{+4.00}_{-4.00}$ | $486 \pm 6.91$  | $282^{+1.00}_{-1.00}$  | $481.00 \pm 2.75$ | $276^{+1.00}_{-1.00}$  | $597 \pm 4.90$  | $296^{+1.00}_{-1.00}$  | $530.65 \pm 3.60$ | $281.00^{+1.00}_{-1.00}$ | $518.69 \pm 2.57$ | $280.00^{+1.00}_{-1.00}$ |

Table 2: Integrated  $F(\lambda)$  and de-reddened  $F_d(\lambda)$  line fluxes (relative to  $H\beta = 100$ ) for the PN NGC 2792, its hosting knots (K1, K2, K3, K4), and a control spectrum.

| $\lambda(\text{\AA})$ | Ion      | Entire nebula    |                         | K1              |                         | K2               |                        | K3               |                        | K4               |                         | Control spectrum |                         |
|-----------------------|----------|------------------|-------------------------|-----------------|-------------------------|------------------|------------------------|------------------|------------------------|------------------|-------------------------|------------------|-------------------------|
|                       |          | $F(\lambda)$     | $F_d(\lambda)$          | $F(\lambda)$    | $F_d(\lambda)$          | $F(\lambda)$     | $F_d(\lambda)$         | $F(\lambda)$     | $F_d(\lambda)$         | $F(\lambda)$     | $F_d(\lambda)$          | $F(\lambda)$     | $F_d(\lambda)$          |
| 6583.50               | [N II]   | $6.08 \pm 0.32$  | $3.26^{+0.18}_{-0.18}$  | $22 \pm 3.35$   | $13.00^{+1.90}_{-1.90}$ | $9.10 \pm 0.40$  | $5.19^{+0.24}_{-0.24}$ | $16.74 \pm 2.92$ | $8.27^{+1.45}_{-1.42}$ | $5.65 \pm 1.03$  | $2.97^{+0.53}_{-0.54}$  | $5.75 \pm 0.23$  | $3.09^{+0.13}_{-0.13}$  |
| 6678.16               | He I     | $2.00 \pm 0.05$  | $1.06^{+0.03}_{-0.03}$  | $3.37 \pm 0.08$ | $1.91^{+0.05}_{-0.05}$  | $3.03 \pm 0.05$  | $1.69^{+0.03}_{-0.03}$ | $2.49 \pm 0.12$  | $1.20^{+0.06}_{-0.06}$ | $2.21 \pm 0.07$  | $1.13^{+0.04}_{-0.04}$  | $2.03 \pm 0.03$  | $1.07^{+0.02}_{-0.02}$  |
| 6683.20               | He II    | $1.20 \pm 0.03$  | $0.66^{+0.02}_{-0.02}$  | $0.84 \pm 0.15$ | $0.47^{+0.08}_{-0.08}$  | $1.01 \pm 0.07$  | $0.56^{+0.04}_{-0.04}$ | $1.56 \pm 0.15$  | $0.74^{+0.07}_{-0.07}$ | $1.17 \pm 0.13$  | $0.60^{+0.06}_{-0.06}$  | $1.29 \pm 0.04$  | $0.67^{+0.02}_{-0.02}$  |
| 6716.44               | [S II]   | $1.16 \pm 0.05$  | $0.60^{+0.03}_{-0.03}$  | $2.77 \pm 0.11$ | $1.55^{+0.06}_{-0.06}$  | $1.41 \pm 0.03$  | $0.78^{+0.02}_{-0.02}$ | $2.69 \pm 0.18$  | $1.27^{+0.08}_{-0.08}$ | $1.43 \pm 0.04$  | $0.73^{+0.02}_{-0.02}$  | $1.23 \pm 0.02$  | $0.64^{+0.01}_{-0.01}$  |
| 6730.82               | [S II]   | $1.51 \pm 0.06$  | $0.75^{+0.03}_{-0.03}$  | $3.63 \pm 0.18$ | $2.02^{+0.10}_{-0.10}$  | $2.01 \pm 0.03$  | $1.11^{+0.02}_{-0.02}$ | $3.58 \pm 0.23$  | $1.69^{+0.11}_{-0.11}$ | $2.02 \pm 0.10$  | $1.02^{+0.05}_{-0.05}$  | $1.54 \pm 0.02$  | $0.80^{+0.01}_{-0.01}$  |
| 6795.00               | [K IV]   | $0.29 \pm 0.02$  | $0.14^{+0.01}_{-0.01}$  | $0.18 \pm 0.04$ | $0.10^{+0.02}_{-0.02}$  | $0.21 \pm 0.03$  | $0.11^{+0.02}_{-0.02}$ | $0.32 \pm 0.08$  | $0.15^{+0.04}_{-0.04}$ | $0.27 \pm 0.03$  | $0.14^{+0.01}_{-0.01}$  | $0.28 \pm 0.02$  | $0.14^{+0.01}_{-0.01}$  |
| 6890.90               | He II    | $1.77 \pm 0.04$  | $0.82^{+0.02}_{-0.02}$  | $1.30 \pm 0.06$ | $0.70^{+0.03}_{-0.03}$  | $1.54 \pm 0.04$  | $0.82^{+0.02}_{-0.02}$ | $2.09 \pm 0.05$  | $0.94^{+0.02}_{-0.02}$ | $1.60 \pm 0.03$  | $0.78^{+0.02}_{-0.02}$  | $1.73 \pm 0.01$  | $0.86^{+0.01}_{-0.01}$  |
| 7005.67               | [Ar V]   | $4.85 \pm 0.04$  | $2.26^{+0.05}_{-0.05}$  | $2.19 \pm 0.17$ | $1.14^{+0.09}_{-0.10}$  | $3.71 \pm 0.09$  | $1.91^{+0.05}_{-0.05}$ | $5.30 \pm 0.32$  | $2.30^{+0.14}_{-0.15}$ | $3.74 \pm 0.17$  | $1.76^{+0.08}_{-0.08}$  | $5.08 \pm 0.14$  | $2.45^{+0.07}_{-0.07}$  |
| 7065.25               | He I     | $2.09 \pm 0.14$  | $0.90^{+0.06}_{-0.07}$  | $4.66 \pm 0.10$ | $2.41^{+0.07}_{-0.07}$  | $3.00 \pm 0.13$  | $1.53^{+0.06}_{-0.06}$ | $2.52 \pm 0.30$  | $1.08^{+0.13}_{-0.13}$ | $2.35 \pm 0.26$  | $1.08^{+0.12}_{-0.13}$  | $1.94 \pm 0.11$  | $0.92^{+0.05}_{-0.05}$  |
| 7135.80               | [Ar III] | $23.71 \pm 0.69$ | $10.58^{+0.37}_{-0.37}$ | $41 \pm 0.08$   | $21^{+0.36}_{-0.36}$    | $27.30 \pm 0.24$ | $14^{+0.17}_{-0.17}$   | $31 \pm 0.48$    | $13^{+0.25}_{-0.25}$   | $23.88 \pm 0.19$ | $10.89^{+0.14}_{-0.14}$ | $23.81 \pm 0.11$ | $11.11^{+0.09}_{-0.09}$ |
| 7177.50               | He II    | $2.10 \pm 0.06$  | $0.96^{+0.03}_{-0.03}$  | $2.00 \pm 0.04$ | $1.02^{+0.02}_{-0.02}$  | $2.18 \pm 0.04$  | $1.08^{+0.02}_{-0.02}$ | $2.7 \pm 0.15$   | $1.1^{+0.66}_{-0.07}$  | $1.79 \pm 0.17$  | $0.81^{+0.08}_{-0.08}$  | $1.05 \pm 0.09$  | $0.04^{+0.04}_{-1.09}$  |
| 7237.17               | C II     | $0.86 \pm 0.05$  | $0.38^{+0.01}_{-0.01}$  | $1.33 \pm 0.06$ | $0.67^{+0.01}_{-0.01}$  | $0.85 \pm 0.05$  | $0.42^{+0.00}_{-0.00}$ | $1.08 \pm 0.04$  | $0.44^{+0.01}_{-0.01}$ | $0.72 \pm 0.06$  | $0.32^{+0.00}_{-0.00}$  | $0.90 \pm 0.04$  | $0.41^{+0.00}_{-0.00}$  |
| 7262.76               | [Ar IV]  | $1.01 \pm 0.03$  | $0.43^{+0.02}_{-0.02}$  | $1.44 \pm 0.02$ | $0.72^{+0.02}_{-0.02}$  | $0.92 \pm 0.02$  | $0.45^{+0.01}_{-0.01}$ | $1.24 \pm 0.05$  | $0.50^{+0.02}_{-0.02}$ | $0.83 \pm 0.03$  | $0.37^{+0.01}_{-0.01}$  | $0.98 \pm 0.01$  | $0.44^{+0.01}_{-0.01}$  |
| 7281.35               | He I     | $0.37 \pm 0.05$  | $0.13^{+0.02}_{-0.02}$  | $0.91 \pm 0.04$ | $0.45^{+0.02}_{-0.02}$  | $0.58 \pm 0.03$  | $0.28^{+0.01}_{-0.01}$ | $0.55 \pm 0.05$  | $0.22^{+0.02}_{-0.02}$ | $0.42 \pm 0.08$  | $0.19^{+0.04}_{-0.04}$  | $0.30 \pm 0.05$  | $0.14^{+0.02}_{-0.02}$  |
| 7318.92               | [O II]   | $0.23 \pm 0.02$  | $0.11^{+0.01}_{-0.01}$  | $1.1 \pm 0.06$  | $0.4^{+0.04}_{-0.04}$   | $0.34 \pm 0.00$  | $0.2^{+0.01}_{-0.01}$  | $0.3 \pm 0.09$   | $0.1^{+0.04}_{-0.04}$  | $0.57 \pm 0.08$  | $0.26^{+0.05}_{-0.05}$  | $0.33 \pm 0.02$  | $0.13^{+0.01}_{-0.01}$  |
| 7319.99               | [O II]   | $0.74 \pm 0.02$  | $0.31^{+0.01}_{-0.01}$  | $1.9 \pm 0.06$  | $0.8^{+0.06}_{-0.07}$   | $1.00 \pm 0.02$  | $0.5^{+0.01}_{-0.01}$  | $1.5 \pm 0.07$   | $0.6^{+0.03}_{-0.03}$  | $1.07 \pm 0.06$  | $0.46^{+0.06}_{-0.07}$  | $0.34 \pm 0.03$  | $0.14^{+0.01}_{-0.01}$  |
| 7329.67               | [O II]   | $0.50 \pm 0.02$  | $0.23^{+0.01}_{-0.01}$  | $1.3 \pm 0.06$  | $0.6^{+0.05}_{-0.05}$   | $0.75 \pm 0.03$  | $0.4^{+0.01}_{-0.01}$  | $0.9 \pm 0.06$   | $0.4^{+0.02}_{-0.02}$  | $0.68 \pm 0.06$  | $0.30^{+0.04}_{-0.05}$  | $0.28 \pm 0.02$  | $0.11^{+0.01}_{-0.01}$  |

Table 2: Integrated  $F(\lambda)$  and de-reddened  $F_d(\lambda)$  line fluxes (relative to  $H\beta = 100$ ) for the PN NGC 2792, its hosting knots (K1, K2, K3, K4), and a control spectrum.

| $\lambda(\text{\AA})$ | Ion      | Entire nebula   |                        | K1              |                        | K2              |                        | K3              |                        | K4              |                        | Control spectrum |                        |
|-----------------------|----------|-----------------|------------------------|-----------------|------------------------|-----------------|------------------------|-----------------|------------------------|-----------------|------------------------|------------------|------------------------|
|                       |          | $F(\lambda)$    | $F_d(\lambda)$         | $F(\lambda)$    | $F_d(\lambda)$         | $F(\lambda)$    | $F_d(\lambda)$         | $F(\lambda)$    | $F_d(\lambda)$         | $F(\lambda)$    | $F_d(\lambda)$         | $F(\lambda)$     | $F_d(\lambda)$         |
| 7330.73               | [O II]   | $0.24 \pm 0.02$ | $0.11^{+0.01}_{-0.01}$ | $0.9 \pm 0.06$  | $0.4^{+0.04}_{-0.04}$  | $0.49 \pm 0.03$ | $0.2^{+0.01}_{-0.01}$  | $0.6 \pm 6.00$  | $0.3^{+0.03}_{-0.03}$  | $0.38 \pm 0.06$ | $0.20^{+0.03}_{-0.04}$ | $0.30 \pm 0.06$  | $0.01^{+0.00}_{-0.00}$ |
| 7331.40               | [Ar IV]  | $0.27 \pm 0.02$ | $0.11^{+0.01}_{-0.01}$ | $0.27 \pm 0.02$ | $0.13^{+0.01}_{-0.01}$ | $0.17 \pm 0.02$ | $0.08^{+0.01}_{-0.01}$ | $0.18 \pm 0.05$ | $0.07^{+0.02}_{-0.02}$ | $0.17 \pm 0.02$ | $0.07^{+0.01}_{-0.01}$ | $0.25 \pm 0.01$  | $0.11^{+0.01}_{-0.01}$ |
| 7530.83               | [Cl IV]  | $1.56 \pm 0.26$ | $0.66^{+0.11}_{-0.11}$ | $1.94 \pm 0.34$ | $0.92^{+0.16}_{-0.16}$ | $1.29 \pm 0.23$ | $0.59^{+0.10}_{-0.10}$ | $1.99 \pm 0.33$ | $0.76^{+0.12}_{-0.13}$ | $1.36 \pm 0.23$ | $0.57^{+0.09}_{-0.09}$ | $1.58 \pm 0.26$  | $0.68^{+0.11}_{-0.11}$ |
| 7592.74               | He II    | $3.50 \pm 0.12$ | $1.47^{+0.06}_{-0.06}$ | $5.58 \pm 0.15$ | $2.60^{+0.09}_{-0.09}$ | $3.68 \pm 0.09$ | $1.68^{+0.04}_{-0.04}$ | $4.49 \pm 0.20$ | $1.68^{+0.08}_{-0.08}$ | $3.09 \pm 0.12$ | $1.27^{+0.05}_{-0.05}$ | $3.61 \pm 0.13$  | $1.52^{+0.06}_{-0.06}$ |
| 7751.06               | [Ar III] | $6.21 \pm 0.06$ | $2.46^{+0.06}_{-0.06}$ | $11 \pm 0.32$   | $4.76^{+0.10}_{-0.10}$ | $6.75 \pm 0.06$ | $3.00^{+0.03}_{-0.03}$ | $8.40 \pm 0.15$ | $3.03^{+0.04}_{-0.04}$ | $6.31 \pm 0.22$ | $2.50^{+0.03}_{-0.03}$ | $6.12 \pm 0.06$  | $2.49^{+0.02}_{-0.02}$ |
| 8045.63               | [Cl IV]  | $4.45 \pm 0.03$ | $1.65^{+0.04}_{-0.04}$ | $5.77 \pm 0.06$ | $2.48^{+0.06}_{-0.06}$ | $3.82 \pm 0.03$ | $1.61^{+0.02}_{-0.02}$ | $5.79 \pm 0.29$ | $1.95^{+0.10}_{-0.10}$ | $3.94 \pm 0.07$ | $1.47^{+0.03}_{-0.03}$ | $4.42 \pm 0.10$  | $1.70^{+0.04}_{-0.04}$ |
| 8276.31               | H I      | $0.10 \pm 0.01$ | $0.03^{+0.00}_{-0.00}$ | $0.13 \pm 0.03$ | $0.05^{+0.01}_{-0.01}$ | $0.08 \pm 0.02$ | $0.03^{+0.01}_{-0.01}$ |                 |                        |                 |                        | $0.11 \pm 0.02$  | $0.04^{+0.01}_{-0.01}$ |
| 8281.12               | H I      | $0.13 \pm 0.03$ | $0.05^{+0.01}_{-0.01}$ | $0.18 \pm 0.05$ | $0.07^{+0.02}_{-0.02}$ | $0.15 \pm 0.04$ | $0.06^{+0.01}_{-0.02}$ |                 |                        | $0.13 \pm 0.04$ | $0.05^{+0.01}_{-0.01}$ |                  |                        |
| 8286.43               | H I      | $0.21 \pm 0.04$ | $0.07^{+0.01}_{-0.01}$ | $0.31 \pm 0.05$ | $0.13^{+0.02}_{-0.02}$ | $0.18 \pm 0.03$ | $0.07^{+0.01}_{-0.01}$ | $0.17 \pm 0.04$ | $0.06^{+0.01}_{-0.01}$ | $0.17 \pm 0.04$ | $0.06^{+0.01}_{-0.01}$ | $0.21 \pm 0.04$  | $0.08^{+0.01}_{-0.00}$ |
| 8292.31               | H I      | $0.22 \pm 0.02$ | $0.07^{+0.01}_{-0.01}$ | $0.36 \pm 0.04$ | $0.15^{+0.02}_{-0.02}$ | $0.21 \pm 0.03$ | $0.09^{+0.01}_{-0.01}$ | $0.24 \pm 0.03$ | $0.08^{+0.01}_{-0.01}$ | $0.17 \pm 0.02$ | $0.06^{+0.01}_{-0.01}$ | $0.20 \pm 0.01$  | $0.07^{+0.00}_{-0.01}$ |
| 8298.83               | H I      | $0.16 \pm 0.03$ | $0.06^{+0.01}_{-0.01}$ | $0.42 \pm 0.04$ | $0.17^{+0.02}_{-0.02}$ | $0.27 \pm 0.03$ | $0.11^{+0.01}_{-0.01}$ | $0.33 \pm 0.06$ | $0.10^{+0.02}_{-0.02}$ | $0.22 \pm 0.04$ | $0.08^{+0.01}_{-0.01}$ | $0.23 \pm 0.02$  | $0.09^{+0.01}_{-0.00}$ |
| 8306.11               | H I      | $0.28 \pm 0.01$ | $0.10^{+0.00}_{-0.00}$ | $0.46 \pm 0.02$ | $0.19^{+0.01}_{-0.01}$ | $0.32 \pm 0.01$ | $0.13^{+0.01}_{-0.01}$ | $0.43 \pm 0.04$ | $0.14^{+0.01}_{-0.01}$ | $0.30 \pm 0.02$ | $0.11^{+0.01}_{-0.01}$ | $0.27 \pm 0.01$  | $0.10^{+0.00}_{-0.02}$ |
| 8314.26               | H I      | $0.35 \pm 0.05$ | $0.11^{+0.02}_{-0.02}$ | $0.46 \pm 0.07$ | $0.19^{+0.03}_{-0.03}$ | $0.31 \pm 0.04$ | $0.12^{+0.02}_{-0.02}$ | $0.43 \pm 0.05$ | $0.14^{+0.02}_{-0.02}$ | $0.28 \pm 0.04$ | $0.10^{+0.01}_{-0.01}$ | $0.30 \pm 0.05$  | $0.11^{+0.02}_{-0.01}$ |
| 8323.42               | H I      | $0.27 \pm 0.03$ | $0.12^{+0.01}_{-0.01}$ | $0.52 \pm 0.04$ | $0.21^{+0.02}_{-0.02}$ | $0.35 \pm 0.03$ | $0.14^{+0.01}_{-0.01}$ | $0.38 \pm 0.03$ | $0.12^{+0.01}_{-0.01}$ | $0.28 \pm 0.03$ | $0.10^{+0.01}_{-0.01}$ | $0.33 \pm 0.03$  | $0.12^{+0.01}_{-0.01}$ |
| 8333.78               | H I      | $0.41 \pm 0.03$ | $0.14^{+0.01}_{-0.01}$ | $0.64 \pm 0.04$ | $0.26^{+0.02}_{-0.02}$ | $0.42 \pm 0.03$ | $0.17^{+0.01}_{-0.01}$ | $0.52 \pm 0.04$ | $0.17^{+0.01}_{-0.01}$ | $0.39 \pm 0.02$ | $0.14^{+0.01}_{-0.01}$ | $0.40 \pm 0.02$  | $0.15^{+0.01}_{-0.01}$ |
| 8345.47               | H I      | $0.40 \pm 0.11$ | $0.13^{+0.04}_{-0.04}$ | $0.61 \pm 0.06$ | $0.25^{+0.02}_{-0.03}$ | $0.42 \pm 0.04$ | $0.17^{+0.02}_{-0.02}$ | $0.71 \pm 0.14$ | $0.22^{+0.04}_{-0.04}$ | $0.44 \pm 0.07$ | $0.16^{+0.02}_{-0.02}$ | $0.34 \pm 0.08$  | $0.12^{+0.03}_{-0.00}$ |
| 8359.00               | H I      | $0.43 \pm 0.02$ | $0.16^{+0.01}_{-0.01}$ | $0.72 \pm 0.03$ | $0.30^{+0.01}_{-0.01}$ | $0.49 \pm 0.02$ | $0.19^{+0.01}_{-0.01}$ | $0.55 \pm 0.04$ | $0.18^{+0.01}_{-0.01}$ | $0.42 \pm 0.03$ | $0.15^{+0.01}_{-0.01}$ | $0.45 \pm 0.01$  | $0.17^{+0.00}_{-0.00}$ |



Table 2: Integrated  $F(\lambda)$  and de-reddened  $F_d(\lambda)$  line fluxes (relative to  $H\beta = 100$ ) for the PN NGC 2792, its hosting knots (K1, K2, K3, K4), and a control spectrum.

| $\lambda(\text{\AA})$ | Ion      | Entire nebula |                                        | K1           |                                        | K2           |                                        | K3           |                                        | K4           |                                        | Control spectrum |                                        |
|-----------------------|----------|---------------|----------------------------------------|--------------|----------------------------------------|--------------|----------------------------------------|--------------|----------------------------------------|--------------|----------------------------------------|------------------|----------------------------------------|
|                       |          | $F(\lambda)$  | $F_d(\lambda)$                         | $F(\lambda)$ | $F_d(\lambda)$                         | $F(\lambda)$ | $F_d(\lambda)$                         | $F(\lambda)$ | $F_d(\lambda)$                         | $F(\lambda)$ | $F_d(\lambda)$                         | $F(\lambda)$     | $F_d(\lambda)$                         |
| 8374.48               | H I      | 0.47 ± 0.01   | 0.16 <sup>+0.01</sup> <sub>-0.01</sub> | 0.79 ± 0.02  | 0.32 <sup>+0.01</sup> <sub>-0.01</sub> | 0.52 ± 0.01  | 0.21 <sup>+0.01</sup> <sub>-0.01</sub> | 0.59 ± 0.03  | 0.19 <sup>+0.01</sup> <sub>-0.01</sub> | 0.47 ± 0.03  | 0.16 <sup>+0.01</sup> <sub>-0.01</sub> | 0.48 ± 0.01      | 0.17 <sup>+0.00</sup> <sub>-0.01</sub> |
| 8392.40               | H I      | 0.57 ± 0.01   | 0.21 <sup>+0.01</sup> <sub>-0.01</sub> | 0.96 ± 0.03  | 0.39 <sup>+0.01</sup> <sub>-0.01</sub> | 0.65 ± 0.01  | 0.26 <sup>+0.01</sup> <sub>-0.01</sub> | 0.82 ± 0.04  | 0.26 <sup>+0.01</sup> <sub>-0.01</sub> | 0.55 ± 0.03  | 0.19 <sup>+0.01</sup> <sub>-0.01</sub> | 0.59 ± 0.01      | 0.21 <sup>+0.01</sup> <sub>-0.00</sub> |
| 8413.32               | H I      | 0.64 ± 0.02   | 0.23 <sup>+0.01</sup> <sub>-0.01</sub> | 1.09 ± 0.04  | 0.44 <sup>+0.02</sup> <sub>-0.02</sub> | 0.73 ± 0.02  | 0.29 <sup>+0.01</sup> <sub>-0.01</sub> | 0.86 ± 0.04  | 0.27 <sup>+0.01</sup> <sub>-0.01</sub> | 0.60 ± 0.05  | 0.21 <sup>+0.02</sup> <sub>-0.00</sub> | 0.66 ± 0.01      | 0.24 <sup>+0.01</sup> <sub>-0.00</sub> |
| 8421.99               | He I     | 0.06 ± 0.01   | 0.02 <sup>+0.00</sup> <sub>-0.00</sub> | 0.09 ± 0.02  | 0.04 <sup>+0.01</sup> <sub>-0.01</sub> | 0.06 ± 0.01  | 0.02 <sup>+0.01</sup> <sub>-0.01</sub> | 0.08 ± 0.02  | 0.03 <sup>+0.01</sup> <sub>-0.01</sub> | 0.07 ± 0.01  | 0.02 <sup>+0.01</sup> <sub>-0.01</sub> | 0.06 ± 0.01      | 0.02 <sup>+0.00</sup> <sub>-0.00</sub> |
| 8437.95               | H I      | 0.81 ± 0.01   | 0.28 <sup>+0.01</sup> <sub>-0.01</sub> | 1.32 ± 0.03  | 0.53 <sup>+0.02</sup> <sub>-0.02</sub> | 0.87 ± 0.02  | 0.34 <sup>+0.01</sup> <sub>-0.01</sub> | 1.05 ± 0.04  | 0.33 <sup>+0.01</sup> <sub>-0.01</sub> | 0.69 ± 0.02  | 0.24 <sup>+0.01</sup> <sub>-0.01</sub> | 0.78 ± 0.01      | 0.28 <sup>+0.00</sup> <sub>-0.01</sub> |
| 8467.25               | H I      | 1.00 ± 0.03   | 0.33 <sup>+0.01</sup> <sub>-0.01</sub> | 1.57 ± 0.04  | 0.63 <sup>+0.02</sup> <sub>-0.02</sub> | 1.03 ± 0.03  | 0.41 <sup>+0.01</sup> <sub>-0.01</sub> | 1.19 ± 0.05  | 0.37 <sup>+0.02</sup> <sub>-0.02</sub> | 0.90 ± 0.02  | 0.31 <sup>+0.01</sup> <sub>-0.01</sub> | 0.94 ± 0.02      | 0.34 <sup>+0.01</sup> <sub>-0.00</sub> |
| 8480.85               | [Cl III] | 0.09 ± 0.01   | 0.04 <sup>+0.00</sup> <sub>-0.00</sub> | 0.19 ± 0.03  | 0.08 <sup>+0.01</sup> <sub>-0.01</sub> | 0.13 ± 0.02  | 0.05 <sup>+0.01</sup> <sub>-0.01</sub> | 0.19 ± 0.03  | 0.06 <sup>+0.01</sup> <sub>-0.01</sub> | 0.11 ± 0.02  | 0.04 <sup>+0.01</sup> <sub>-0.01</sub> | 0.11 ± 0.01      | 0.04 <sup>+0.00</sup> <sub>-0.01</sub> |
| 8502.48               | H I      | 1.13 ± 0.04   | 0.38 <sup>+0.02</sup> <sub>-0.02</sub> | 1.77 ± 0.06  | 0.71 <sup>+0.03</sup> <sub>-0.03</sub> | 1.18 ± 0.03  | 0.46 <sup>+0.01</sup> <sub>-0.01</sub> | 1.42 ± 0.07  | 0.44 <sup>+0.02</sup> <sub>-0.02</sub> | 1.02 ± 0.03  | 0.35 <sup>+0.01</sup> <sub>-0.01</sub> | 1.13 ± 0.03      | 0.40 <sup>+0.01</sup> <sub>-0.00</sub> |
| 8519.35               | He II    | 0.11 ± 0.01   | 0.04 <sup>+0.00</sup> <sub>-0.00</sub> | 0.16 ± 0.03  | 0.06 <sup>+0.01</sup> <sub>-0.01</sub> | 0.11 ± 0.02  | 0.04 <sup>+0.01</sup> <sub>-0.01</sub> | 0.17 ± 0.03  | 0.05 <sup>+0.01</sup> <sub>-0.01</sub> |              |                                        | 0.11 ± 0.01      | 0.04 <sup>+0.00</sup> <sub>-0.00</sub> |
| 8545.38               | H I      | 1.43 ± 0.03   | 0.48 <sup>+0.02</sup> <sub>-0.02</sub> | 2.20 ± 0.03  | 0.88 <sup>+0.02</sup> <sub>-0.02</sub> | 1.47 ± 0.02  | 0.57 <sup>+0.01</sup> <sub>-0.01</sub> | 1.69 ± 0.02  | 0.52 <sup>+0.01</sup> <sub>-0.01</sub> | 1.24 ± 0.02  | 0.42 <sup>+0.01</sup> <sub>-0.01</sub> | 1.39 ± 0.01      | 0.49 <sup>+0.01</sup> <sub>-0.00</sub> |
| 8598.39               | H I      | 1.73 ± 0.02   | 0.59 <sup>+0.02</sup> <sub>-0.02</sub> | 2.82 ± 0.04  | 1.11 <sup>+0.03</sup> <sub>-0.03</sub> | 1.88 ± 0.02  | 0.73 <sup>+0.01</sup> <sub>-0.01</sub> | 2.22 ± 0.03  | 0.67 <sup>+0.01</sup> <sub>-0.01</sub> | 1.57 ± 0.04  | 0.53 <sup>+0.02</sup> <sub>-0.01</sub> | 1.73 ± 0.02      | 0.60 <sup>+0.01</sup> <sub>-0.01</sub> |
| 8626.19               | He II    | 0.16 ± 0.01   | 0.05 <sup>+0.01</sup> <sub>-0.01</sub> | 0.28 ± 0.03  | 0.11 <sup>+0.01</sup> <sub>-0.01</sub> | 0.19 ± 0.02  | 0.07 <sup>+0.01</sup> <sub>-0.01</sub> | 0.24 ± 0.05  | 0.07 <sup>+0.02</sup> <sub>-0.02</sub> | 0.14 ± 0.03  | 0.05 <sup>+0.01</sup> <sub>-0.01</sub> | 0.14 ± 0.01      | 0.05 <sup>+0.00</sup> <sub>-0.02</sub> |
| 8665.02               | H I      | 2.30 ± 0.07   | 0.80 <sup>+0.03</sup> <sub>-0.03</sub> | 3.79 ± 0.09  | 1.48 <sup>+0.05</sup> <sub>-0.05</sub> | 2.49 ± 0.06  | 0.95 <sup>+0.02</sup> <sub>-0.02</sub> | 2.92 ± 0.06  | 0.87 <sup>+0.02</sup> <sub>-0.02</sub> | 2.05 ± 0.04  | 0.69 <sup>+0.02</sup> <sub>-0.02</sub> | 2.35 ± 0.04      | 0.81 <sup>+0.01</sup> <sub>-0.01</sub> |
| 8701.83               | N II     | 0.12 ± 0.03   | 0.05 <sup>+0.01</sup> <sub>-0.01</sub> | 0.29 ± 0.06  | 0.11 <sup>+0.02</sup> <sub>-0.02</sub> | 0.19 ± 0.04  | 0.07 <sup>+0.02</sup> <sub>-0.01</sub> | 0.24 ± 0.03  | 0.07 <sup>+0.01</sup> <sub>-0.01</sub> | 0.09 ± 0.03  | 0.03 <sup>+0.00</sup> <sub>-0.00</sub> |                  |                                        |
| 8750.47               | H I      | 2.80 ± 0.04   | 0.92 <sup>+0.03</sup> <sub>-0.03</sub> | 4.65 ± 0.04  | 1.80 <sup>+0.05</sup> <sub>-0.05</sub> | 3.06 ± 0.02  | 1.15 <sup>+0.02</sup> <sub>-0.02</sub> | 3.24 ± 0.03  | 0.95 <sup>+0.02</sup> <sub>-0.02</sub> | 2.62 ± 0.04  | 0.87 <sup>+0.02</sup> <sub>-0.02</sub> | 2.79 ± 0.02      | 0.95 <sup>+0.01</sup> <sub>-0.00</sub> |
| 8799.00               | He II    | 0.24 ± 0.05   | 0.08 <sup>+0.02</sup> <sub>-0.02</sub> | 0.42 ± 0.10  | 0.16 <sup>+0.04</sup> <sub>-0.04</sub> | 0.28 ± 0.07  | 0.11 <sup>+0.03</sup> <sub>-0.03</sub> | 0.28 ± 0.08  | 0.08 <sup>+0.02</sup> <sub>-0.02</sub> | 0.19 ± 0.02  | 0.06 <sup>+0.01</sup> <sub>-0.01</sub> | 0.24 ± 0.07      | 0.08 <sup>+0.02</sup> <sub>-0.00</sub> |
| 8862.78               | H I      | 3.86 ± 0.07   | 1.21 <sup>+0.04</sup> <sub>-0.04</sub> | 6.08 ± 0.04  | 2.32 <sup>+0.06</sup> <sub>-0.06</sub> | 4.05 ± 0.02  | 1.50 <sup>+0.02</sup> <sub>-0.02</sub> | 4.67 ± 0.06  | 1.35 <sup>+0.03</sup> <sub>-0.03</sub> | 3.45 ± 0.05  | 1.12 <sup>+0.02</sup> <sub>-0.02</sub> | 3.78 ± 0.02      | 1.27 <sup>+0.01</sup> <sub>-0.00</sub> |

Table 2: Integrated  $F(\lambda)$  and de-reddened  $F_d(\lambda)$  line fluxes (relative to  $H\beta = 100$ ) for the PN NGC 2792, its hosting knots (K1, K2, K3, K4), and a control spectrum.

| $\lambda(\text{\AA})$ | Ion   | Entire nebula   |                        | K1              |                        | K2              |                        | K3              |                        | K4              |                        | Control spectrum |                        |
|-----------------------|-------|-----------------|------------------------|-----------------|------------------------|-----------------|------------------------|-----------------|------------------------|-----------------|------------------------|------------------|------------------------|
|                       |       | $F(\lambda)$    | $F_d(\lambda)$         | $F(\lambda)$    | $F_d(\lambda)$         | $F(\lambda)$    | $F_d(\lambda)$         | $F(\lambda)$    | $F_d(\lambda)$         | $F(\lambda)$    | $F_d(\lambda)$         | $F(\lambda)$     | $F_d(\lambda)$         |
| 8929.11               | He II | $0.29 \pm 0.01$ | $0.09^{+0.00}_{-0.00}$ | $0.40 \pm 0.02$ | $0.15^{+0.01}_{-0.01}$ | $0.26 \pm 0.02$ | $0.10^{+0.01}_{-0.01}$ | $0.42 \pm 0.04$ | $0.12^{+0.01}_{-0.01}$ | $0.21 \pm 0.02$ | $0.07^{+0.01}_{-0.01}$ | $0.27 \pm 0.01$  | $0.09^{+0.00}_{-0.00}$ |
